# Supplementary material for: Workplace Vaccination against COVID-19 and Seasonal Influenza in the United States: A Modeling Based Estimation of the Health and Economic Benefits for Employers and Employees
Source: Preprints.org preprint supplement (doi:10.20944/preprints202407.1919.v1), 2024-07-24
Supplement: Supplementary file 1 [file supplementary]

# APPENDIX

# Workplace vaccination against COVID-19 and seasonal influenza in the United States: a modeling based estimation of the health and economic benefits for employers and employees

Ekkehard Beck1, Keya Joshi1, Darshan Mehta1, Stephane Lorenc2, Bishoy Rizkalla1, Nicolas Van de Velde1

Table S1. Input parameters

| **Input parameter** | **COVID-19** | **Seasonal influenza** |
| --- | --- | --- |
| Employer inputs | | |
| Employees | N=10,000 (base-case)  N=1,000  N=100,000 | |
| Dependents per employee | 0.86 [1] based on average n of <18yo in families | |
| Mean wage, annual | $61,441.60 [2] based on 220d*8hours | |
| % employees insured | 60% [3] based on % of employees taking coverage at firms offering health benefits | |
| Employee medical insurance co-pay | 25% (assumption) | |
| Paid sick days | 10d (assumption) | |
| Working population (1000s) | 18–29y: 35,327 [4] | |
| 30–39y: 33,303 | |
| 40–49y: 30,484 | |
| 50–64y: 40,403 | |
| 65–74y: 7,971 | |
| 75–84y: 1,847 | |
| Current % vaccinated (employees & dependents) | 6m–17y: 14.4% [5] | 6m–17y: 53.9% [6, 7] |
| 18–49y: 14.7% | 18–49y: 37.5% |
| 50–64y: 23.5% | 50–64y: 51.5% |
| ≥65y: 35.7% | ≥65y: 73.8% |
| Target vaccination rate (employees & dependents) | 70% for all ages [8] based on national flu vaccination target | |
| Vaccine inputs | | |
| VE against symptomatic infection  (see appendix S1 for detailed derivation for COVID-19 VE) | 23.52% [9] | 45.00% [10] |
| VE against hospitalization  (see appendix S1 for detailed derivation for COVID-19 VE) | 57.25% [9] | 23.00% [10] |
| Probabilities | | |
| Symptomatic infection (annual, employees 18–64y) | 20.8% [11] based on employee population weighted incidence | 8.9% [12] |
| Outpatient visit (for employee infection) | 39.2% [10] based on flu data | |
| Outpatient visit (for dependent infection) | 56.1% [10] based on flu data | |
| Hospitalization (employee 18–64y) | 0.61% [13] | 0.74% [14] |
| Hospitalization (dependent) | 1.00% [13] | 0.39% [14] |
| Hospital mortality (employee) | 2.07% [15] | 4.5% [14] |
| Hospital mortality (dependent) | 0.37% [15] | 0.99% [14] |
| Severe long COVID among symptomatic infected (with time off work) | 2.2% | NA |
| Productivity loss | | |
| Symptomatic infection (employee, no hospital) | 3.57d [11] | 3.2d [16, 17] |
| Symptomatic infection (dependent, no hospital) | 3.57d [11] (assumption) | 3.2d [16, 17] (assumption) |
| Symptomatic infection (employee, inpatient) | 42.31d [11, 18] (includes recovery time) | 6d [17] |
| Symptomatic infection (dependent, inpatient) | 9.1d [17] based on flu | 9.1d [17] (employee absence for caregiving) |
| Severe long COVID, annual | 82.4d [19, 20] | NA |
| Replacement duration (in case of death) | 56d [21] | |
| Costs (inflated to 2023 price level [22] as needed) | | |
| Workday missed | $279.28 [2] | |
| Replacement cost | $14,724 based on replacement duration* cost of workday missed | |
| Outpatient care | $477.17 [11] (assumed same for dependents) | $328.40 [22, 23] |
| Hospitalization | $22,853.01 [11] (assumed same for dependents) | $28,488.20 [22, 23] |
| Post-COVID follow-up cost over 1 year for any medically attended COVID-19 infection | $517.32 [22, 24] (assumed same for dependents) | NA |

COVID-19: coronavirus disease 2019; D: day; flu: influenza; M: month; N: number; NA: not applicable; VE: vaccine effectiveness; y: year; yo: year-olds

## Appendix File S1 – Detailed model calculations

### Vaccine effectiveness calculations

COVID-19 incidence rates per month over the 1-year model horizon, for age groups 18–29 years, 30–39 years, 40–49 years and 50–64 years [11], take account of the seasonal pattern of COVID-19. These incidence rates were weighted by the population size of the age groups [25] (**Table S2**), and used in the calculation of the average annual vaccine effectiveness (VE).

VE against infection and hospitalization was assumed to have a starting VE which declined each month linearly according to the waning rate of 4.75% for VE against infection and 1.37% for VE against hospitalization [11]. The starting VE was back-calculated, based on the observed VE against infection of 33.10% and against hospitalization of 60.10% at median follow-up time of 63 days [9]. In the model, VE is calculated mid-month, using these observed VE values after 63 days of vaccination and assuming VE peaks two weeks after vaccination and then starts to decline. The estimated annual VE, considering population-weighted incidence, was 23.52% against infection and 57.25% against hospitalization (**Table S3**). These estimates provide an approximation, based on the assumption that individuals are vaccinated at the start of the season.

**Table S2. COVID-19 population-weighted** [25] **incidence rates (%) by month and age group based on** [11]

| **Ages** | **M1** | **M2** | **M3** | **M4** | **M5** | **M6** | **M7** | **M8** | **M9** | **M10** | **M11** | **M12** |
| --- | --- | --- | --- | --- | --- | --- | --- | --- | --- | --- | --- | --- |
| 18-29 years | 0.49 | 0.67 | 0.80 | 0.89 | 0.81 | 0.60 | 0.47 | 0.32 | 0.23 | 0.16 | 0.13 | 0.11 |
| 30-39 years | 0.42 | 0.57 | 0.68 | 0.77 | 0.70 | 0.52 | 0.41 | 0.27 | 0.20 | 0.14 | 0.11 | 0.09 |
| 40-49 years | 0.37 | 0.51 | 0.61 | 0.69 | 0.64 | 0.48 | 0.37 | 0.25 | 0.18 | 0.12 | 0.10 | 0.08 |
| 50-64 years | 0.45 | 0.63 | 0.77 | 0.90 | 0.85 | 0.65 | 0.51 | 0.34 | 0.24 | 0.16 | 0.13 | 0.11 |
| **Total 18-64y** | **1.73** | **2.38** | **2.86** | **3.24** | **3.00** | **2.25** | **1.76** | **1.18** | **0.85** | **0.59** | **0.46** | **0.39** |

Table S3. Vaccine effectiveness per mid-month for ages 18–64 years

|  | **M1** | **M2** | **M3** | **M4** | **M5** | **M6** | **M7** | **M8** | **M9** | **M10** | **M11** | **M12** |
| --- | --- | --- | --- | --- | --- | --- | --- | --- | --- | --- | --- | --- |
| VE against infection | | | | | | | | | | | | |
| Linear (%) | 40.23 | 35.48 | 30.73 | 28.35 | 23.60 | 18.85 | 14.10 | 9.35 | 4.60 | 0.00 | 0.00 | 0.00 |
| Incidence-weighted (%) | 3.37 | 4.07 | 4.25 | 4.44 | 3.42 | 2.05 | 1.20 | 0.53 | 0.19 | 0.00 | 0.00 | 0.00 |
| **Cumulative incidence -weighted VE against infection over 1 year** | | | | | | | | | | | | **23.52** |
| VE against hospitalization | | | | | | | | | | | | |
| Linear (%) | 62.16 | 60.79 | 59.42 | 58.73 | 57.36 | 55.99 | 54.62 | 53.25 | 51.88 | 50.51 | 49.14 | 47.77 |
| Incidence-weighted (%) | 5.20 | 6.98 | 8.22 | 9.19 | 8.32 | 6.10 | 4.64 | 3.04 | 2.12 | 1.43 | 1.10 | 0.91 |
| **Cumulative incidence -weighted VE against hospitalization over 1 year** | | | | | | | | | | | | **57.25** |

### Long COVID productivity loss calculations

Overall, 2.19% of symptomatic COVID-19 cases experienced persistent long COVID [11]. Of these, 33.28% stopped working [19] i.e., 0.73% overall stopped working; and the remaining 1.46% were assumed to keep working with an impact on productivity.

The overall productivity loss due to severe long COVID of 82.41 days was based on productivity losses in people working with absenteeism days; people who stopped work for a period of time and then returned; and people who stopped work for the model time horizon of 1 year. Proportions of people who returned to work or remained out of work within 0–2 months, 2–6 months, 6–12 months and >1 year after COVID-19 were based on the distribution from the New York State Insurance Fund (NYSIF) [20] (**Table S4**). Productivity loss due to long COVID absenteeism was estimated at 5.19 days per month [11].

For those who kept working with long COVID, the productivity loss per month (5.19 days [11]) was multiplied by 12 months (i.e., total 62.28 days of lost productivity). For those who eventually returned to work, lost productivity accounted for fully absent days and days after returning to work but still experiencing absenteeism (i.e., total 97.32 days of lost productivity). For those who did not return to work, 62% were assumed to have been out for more than a year (i.e., total 179.20 days of lost productivity). The overall productivity loss due to severe long COVID, considering the three groups’ average days lost, was 82.41 days (**Table S5**).

**Table S4. Estimates of proportions returning to work and stopping work over time based on NYSIF report** [20]

|  | **% returned to work** | **% not returned to work** | **Number (%) returned** | **Number (%) did not return** |
| --- | --- | --- | --- | --- |
| **<2m** | 95.83% | 4.17% | 373 (59.93%) | 16 (5.77%) |
| **2–6m** | 94.37% | 5.63% | 204 (32.74%) | 12 (4.33%) |
| **6m–1y** | 22.73% | 77.27% | 25 (4.07%) | 86 (30.68%) |
| **≥1y** | 10.87% | 89.13% | 20 (3.26%) | 166 (59.20%) |
|  |  |  | **622 (100%)** | **281 (100%)** |

m: month; NYSIF: New York State Insurance Fund; y: year

**Table S5. Calculations and assumptions for overall productivity loss for long COVID**

|  | **Calculations and assumptions** | **Days lost/y** |
| --- | --- | --- |
| Kept working with absenteeism | 5.19d off/m *12m | 62.28d |
| Stopped and returned to work | - 59.93% had 1m off + 11m with 5.19d off/m - 32.74% had 4m off + 8m with 5.19d off/m - 4.07% had 9m off + 3m with 5.19d off/m - 3.26% had 12m off | 97.32d |
| Stopped work | - Assumed 62% had 12m off   Among remaining 38%:   - 57.14% (16/28) stopped for 4m - 42.86% (12/28) stopped for 9m | 179.20d |
| **Average overall productivity loss for long COVID** | - 1.46% who kept working with 62.28d lost   Among 0.73% who stopped work:   - 68.91% (622/902) returned to work with 97.32d lost - 31.09% (281/902) who did not return with 179.20d lost | **82.41d** |

d: day; m: month; y: year

# REFERENCES

1. United States Census Bureau. America’s Families and Living Arrangements: 2022. Table AVG2. Average Number of People per Family Household, by Race and Hispanic Origin1, Marital Status, Age, and Education of Householder: 2022. <https://www.census.gov/data/tables/2022/demo/families/cps-2022.html>. Accessed 06-12-2024.

2. U.S. Bureau of Labor Statistics. Table B-3. Average hourly and weekly earnings of all employees on private nonfarm payrolls by industry sector, seasonally adjusted. <https://www.bls.gov/news.release/empsit.t19.htm>. Accessed 06-25-2024.

3. Kaiser Family Foundation. Employer Health Benefits 2022 Annual Survey. <https://www.kff.org/report-section/ehbs-2022-summary-of-findings/>. Accessed 06-12-2024.

4. U.S. Bureau of Labor Statistics. Labor Force Statistics from the Current Population Survey - Household data annual averages 3. Employment status of the civilian noninstitutional population by age, sex, and race. <https://www.bls.gov/cps/cpsaat03.htm>. Accessed 06-12-2024.

5. Centers for Disease Control and Prevention (CDC). National sample: Received a 2023-2024 COVID-19 Vaccine dose (among all adults 18 plus) April 28th to May 25th, 2024. <https://www.cdc.gov/vaccines/imz-managers/coverage/covidvaxview/interactive/adults.html>. Accessed 06-25-2024.

6. Centers for Disease Control and Prevention (CDC). Influenza Vaccination Coverage, Children 6 months through 17 years, United States. <https://www.cdc.gov/flu/fluvaxview/dashboard/vaccination-coverage-race.html>. Accessed 06-25-2024.

7. Centers for Disease Control and Prevention (CDC). CDC Influenza Vaccination Coverage, Adults. <https://www.cdc.gov/flu/fluvaxview/dashboard/vaccination-adult-coverage.html>. Accessed 06-25-2024.

8. !!! INVALID CITATION !!! .

9. Kopel H, Araujo AB, Bogdanov A, Zeng N, Winer I, Winer-Jones J, et al. Effectiveness of the 2023-2024 Omicron XBB.1.5-containing mRNA COVID-19 vaccine (mRNA-1273.815) in preventing COVID-19-related hospitalizations and medical encounters among adults in the United States: An interim analysis. medRxiv. 2024:2024.04.10.24305549. doi:<https://doi.org/10.1101/2024.04.10.24305549>

10. Centers for Disease Control and Prevention (CDC). Flu Vaccine Effectiveness (VE) Data for 2022-2023. <https://www.cdc.gov/flu/vaccines-work/2022-2023.html>. Accessed 06-25-2024.

11. Kohli MA, Maschio M, Joshi K, Lee A, Fust K, Beck E, et al. The potential clinical impact and cost-effectiveness of the updated COVID-19 mRNA fall 2023 vaccines in the United States. J Med Econ. 2023;26(1):1532-45. doi:<https://doi.org/10.1080/13696998.2023.2281083>

12. Tokars JI, Olsen SJ, Reed C. Seasonal Incidence of Symptomatic Influenza in the United States. Clinical Infectious Diseases. 2017;66(10):1511-8. doi:10.1093/cid/cix1060

13. ModernaTX Inc. Moderna Data on File - Analysis of Optum Clinformatics database: non-vaccinated patients with any medical attendance from September 2023 to February 2024.

14. Centers for Disease Control and Prevention (CDC). Preliminary Estimated Influenza Illnesses, Medical Visits, Hospitalizations, and Deaths in the United States — 2022–2023 Influenza Season. <https://www.cdc.gov/flu/about/burden/2022-2023.htm>. Accessed 06-25-2024.

15. Centers for Disease Control and Prevention (CDC). COVID Data Tracker - Hospitalizations. <https://covid.cdc.gov/covid-data-tracker/#hospitalizations-severity>. Accessed 06-12-2024.

16. Kavet J. A perspective on the significance of pandemic influenza. Am J Public Health. 1977;67(11):1063-70. doi:10.2105/ajph.67.11.1063

17. Blanchet Zumofen MH, Frimpter J, Hansen SA. Impact of Influenza and Influenza-Like Illness on Work Productivity Outcomes: A Systematic Literature Review. Pharmacoeconomics. 2023;41(3):253-73. doi:10.1007/s40273-022-01224-9

18. Chopra V, Flanders SA, O'Malley M, Malani AN, Prescott HC. Sixty-Day Outcomes Among Patients Hospitalized With COVID-19. Ann Intern Med. 2021;174(4):576-8. doi:<https://doi.org/10.7326/m20-5661>

19. Davis HE, Assaf GS, McCorkell L, Wei H, Low RJ, Re'em Y, et al. Characterizing long COVID in an international cohort: 7 months of symptoms and their impact. EClinicalMedicine. 2021;38:101019. doi:10.1016/j.eclinm.2021.101019

20. New York State Insurance Fund (NYSIF). Shining a light on long COVID: An analysis of workers’ compensation data. 2023. <https://ww3.nysif.com/-/media/Files/NYSIF_Publications/PDF/NYSIFLongCOVIDStudy2023.ashx>. Accessed 06-05-2024.

21. Hanly P, Ortega Ortega M, Pearce A, de Camargo Cancela M, Soerjomataram I, Sharp L. Estimating Global Friction Periods for Economic Evaluation: A Case Study of Selected OECD Member Countries. PharmacoEconomics. 2023;41(9):1093-101. doi:<https://doi.org/10.1007/s40273-023-01261-y>

22. U.S. Department of Commerce. Table 1.1.3. Real Gross Domestic Product, Quantity Indexes. <https://apps.bea.gov/iTable/?reqid=19&step=3&isuri=1&1921=survey&1903=11&_gl=1*k0zjxm*_ga*MTc4MzI1NDkzMy4xNzE5Mjk3NDc0*_ga_J4698JNNFT*MTcxOTI5NzQ3My4xLjAuMTcxOTI5NzQ3My42MC4wLjA.#eyJhcHBpZCI6MTksInN0ZXBzIjpbMSwyLDMsM10sImRhdGEiOltbIk5JUEFfVGFibGVfTGlzdCIsIjMiXSxbIkNhdGVnb3JpZXMiLCJTdXJ2ZXkiXSxbIkZpcnN0X1llYXIiLCIyMDIwIl0sWyJMYXN0X1llYXIiLCIyMDI0Il0sWyJTY2FsZSIsIjAiXSxbIlNlcmllcyIsIlEiXV19>. Accessed 06-25-2024.

23. Kim DeLuca E, Gebremariam A, Rose A, Biggerstaff M, Meltzer MI, Prosser LA. Cost-effectiveness of routine annual influenza vaccination by age and risk status. Vaccine. 2023;41(29):4239-48. doi:<https://doi.org/10.1016/j.vaccine.2023.04.069>

24. Chambers LC, Park A, Cole M, Lovgren L, Zandstra T, Beaudoin FL, Collins M. Long-term health care costs following COVID-19: implications for pandemic preparedness. Am J Manag Care. 2023;29(11):566-72. doi:<https://doi.org/10.37765/ajmc.2023.89452>

25. United Nations Department of Economic and Social Affairs- Population Division. World Population Prospects 2022 - Population by Single Age – Both Sexes. <https://population.un.org/wpp/Download/Standard/Population/>. Accessed 07-14-2024.
